# Supplementary material
Source: PubMed Central journal article supplement (PMC3615710)
Supplement: NIHMS380685-supplement-4.pdf [file NIHMS380685-supplement-4.pdf]

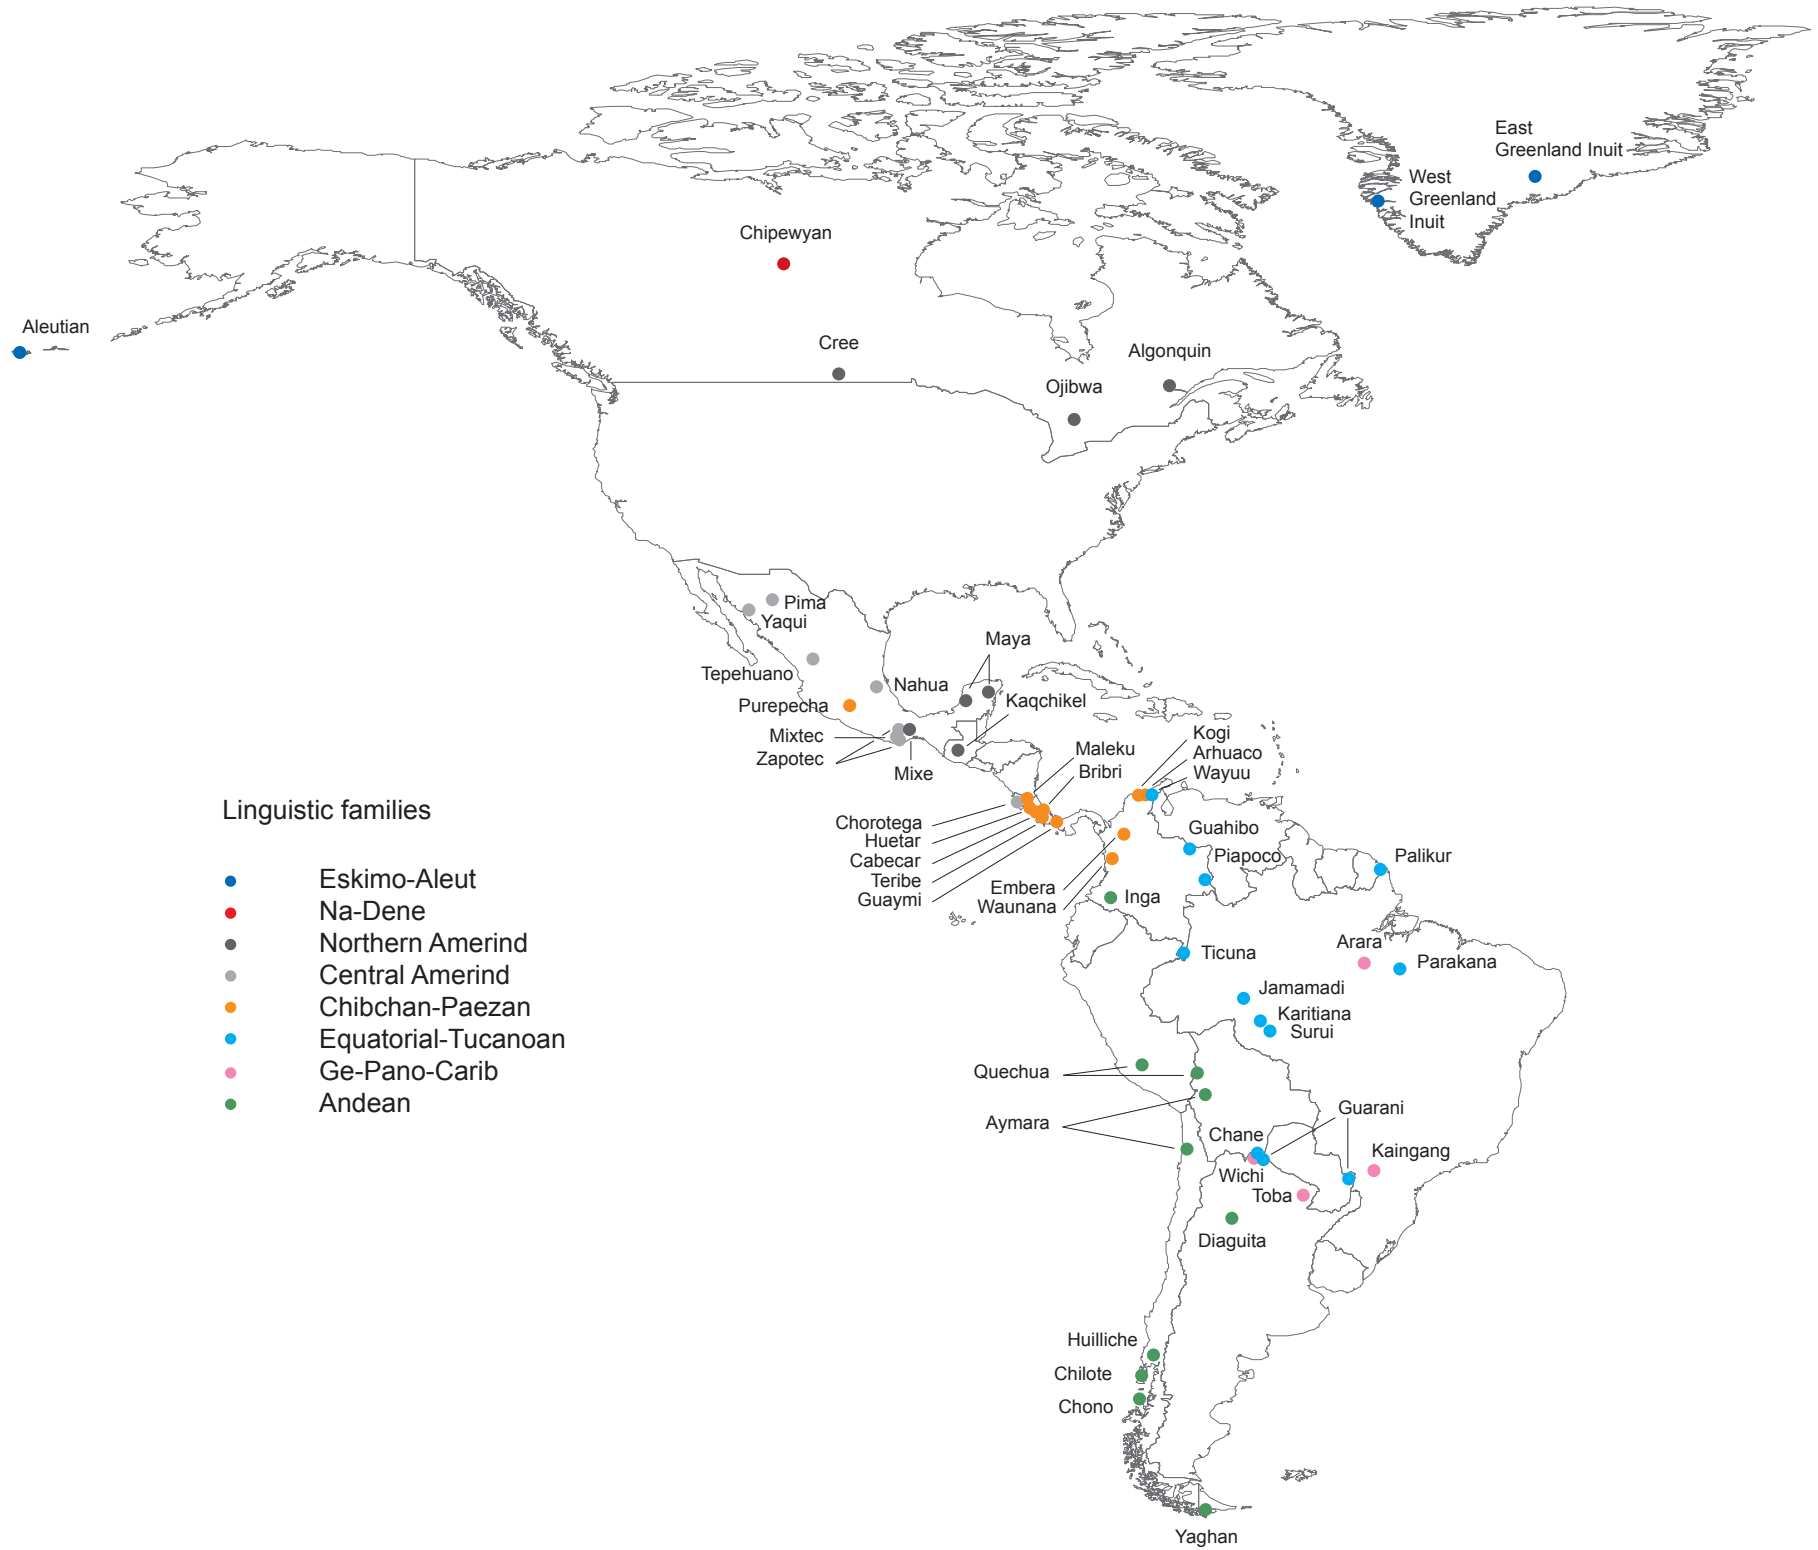

Aleutian

Chipewyan

Cree

Ojibwa

Algonquin

West Greenland Inuit

East Greenland Inuit

Pima Yaqui

Tepehuano

Purepecha

Mixtec

Zapotec

Mixe

Maya

Nahua

Kaqchikel

Maleku

Bribri

Kogi

Arhuaco

Wayuu

Chorotega

Huetar

Cabecar

Teribe

Guaymi

Embera

Waunana

Inga

Guahibo

Piapoco

Palikur

Arara

Parakana

Ticuna

Jamamadi

Karitiana

Surui

Quechua

Aymara

Chane

Wichi

Toba

Guarani

Kaingang

Diaguaita

Huilliche

Chilote

Chono

Yaghan
