# Supplementary material
Source: PubMed Central journal article supplement (PMC3615710)

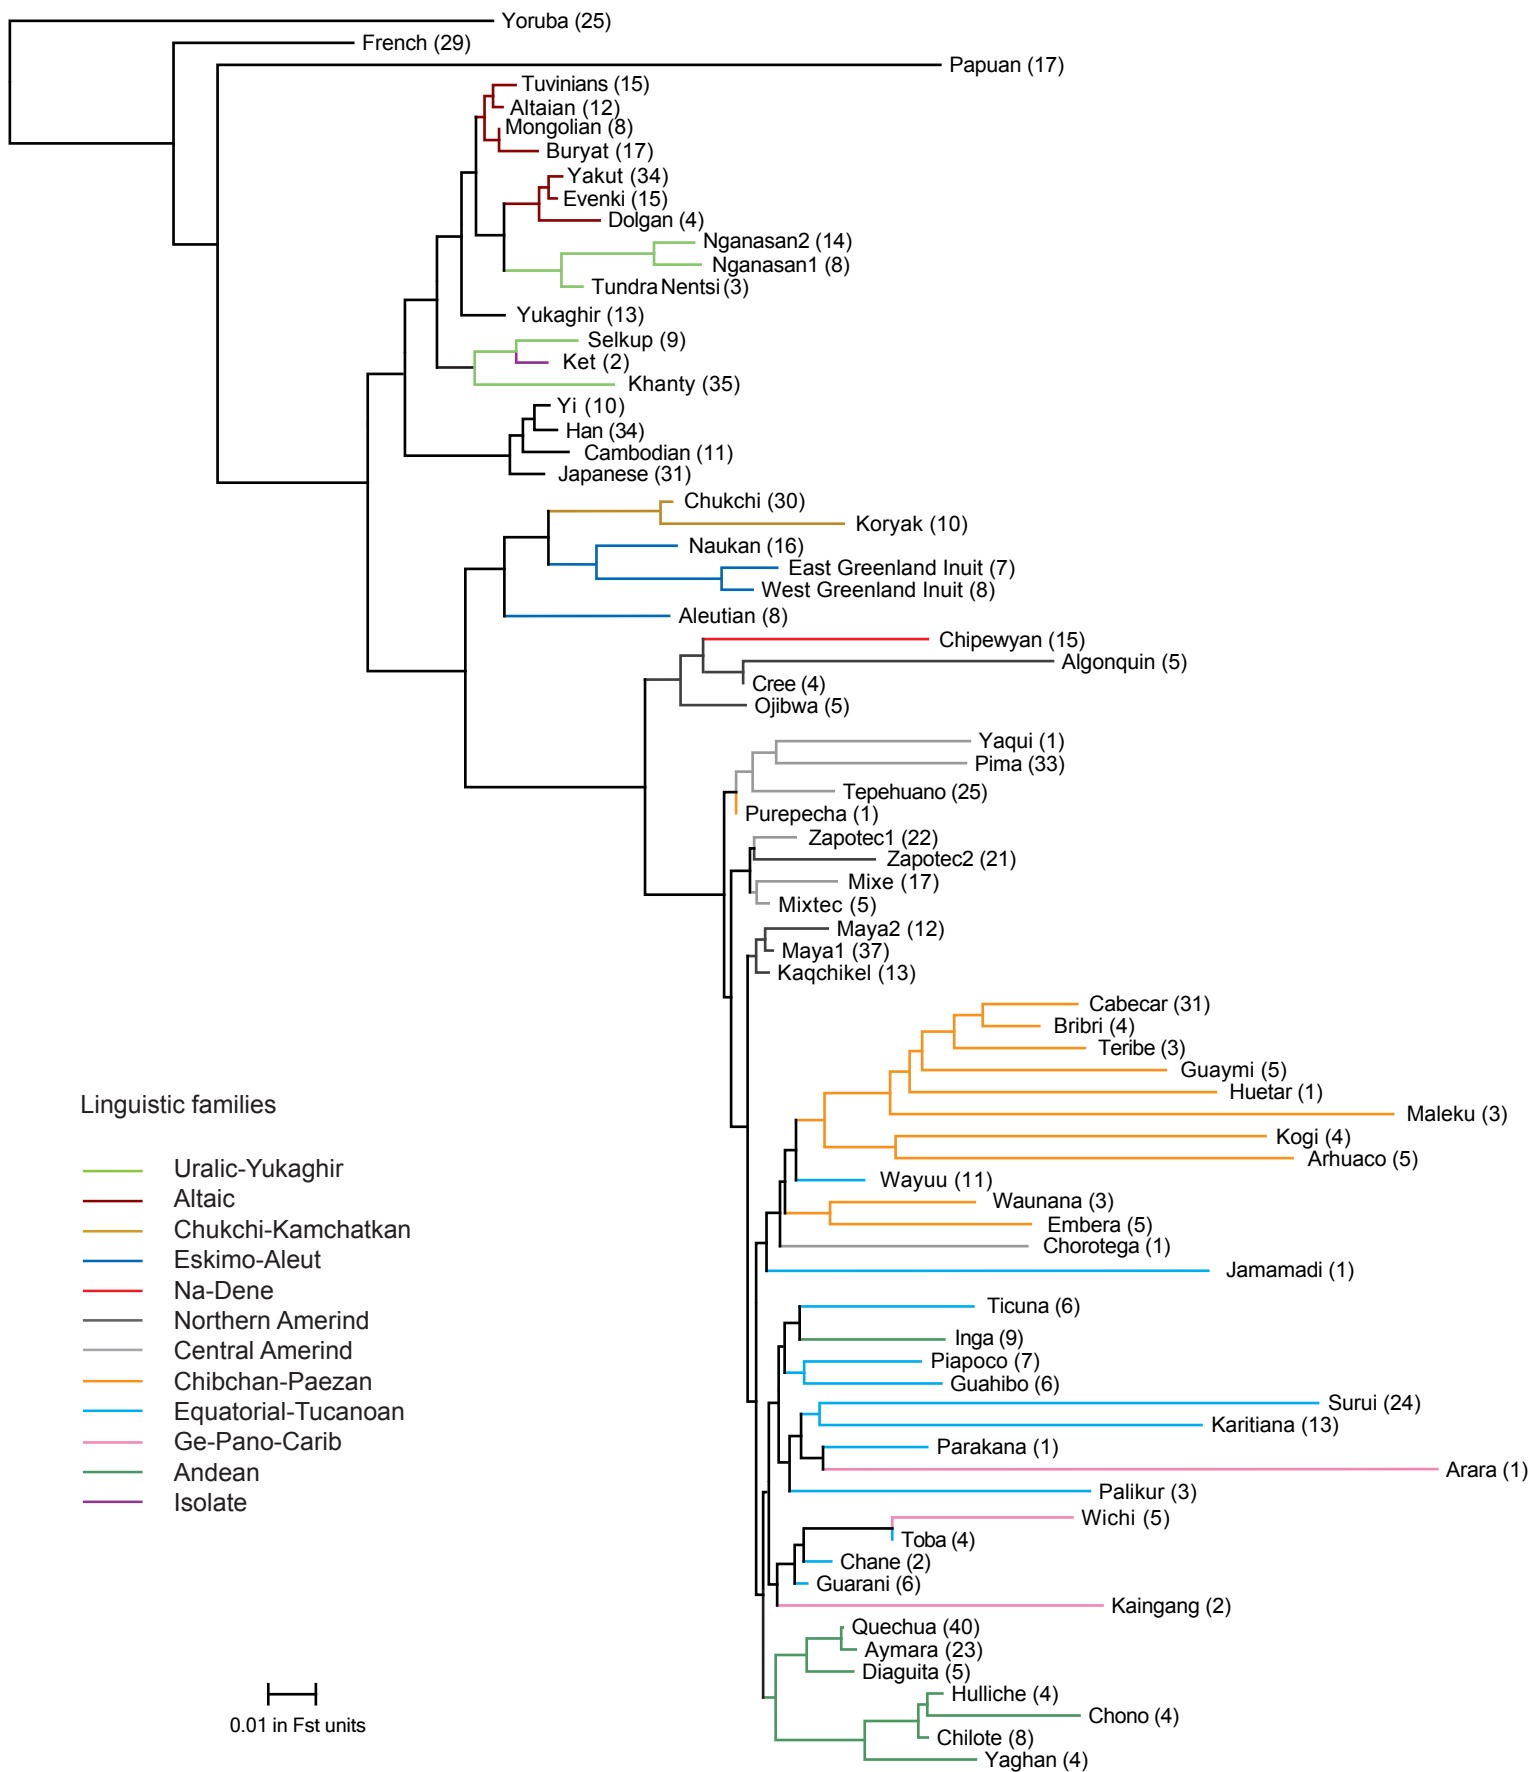

Supplement: NIHMS380685-supplement-2.pdf [file NIHMS380685-supplement-2.pdf]
